# The potential for bike riding across entire cities: quantifying spatial variation in interest in bike riding

Lauren K Pearson<sup>a</sup>, Joanna Dipnall<sup>a,b</sup>, Belinda Gabbe<sup>a,c</sup>, Sandy Braaf<sup>a</sup>, Shelley White<sup>c</sup>, Melissa Backhouse<sup>c</sup>, Ben Beck<sup>a</sup>

Keywords: Cycling, active transport, bike riding, health promotion

- a) School of Public Health and Preventive Medicine, Monash University, Victoria, Australia
- b) School of Medicine, Deakin University, Geelong, Victoria, Australia
- c) Health Data Research UK, Swansea University, Swansea, United Kingdom
- d) VicHealth, Victoria, Australia

## ABSTRACT

**Background:** Riding a bike is beneficial for health, the environment and for reducing traffic congestion. Despite this, bike riding participation in the state of Victoria, Australia, is low. To inform planning and practice, there is a need to understand the proportion of the population (the ‘near-market’) that are interested in riding a bike, and how this varies across regions. The Geller typology classifies individuals into one of four groups, based on their confidence to ride a bike in various infrastructure types, and frequency of bike riding. The typology has been used at a city, state and country-wide scale, however not at a smaller spatial scale. We aimed to characterise and quantify the distribution of the Geller typology within Local Government Areas (LGAs) in the state of Victoria, Australia.

**Methods:** An online survey was conducted in 37 LGAs in Victoria, including all LGAs in Greater Melbourne, and a selection of six key regional centres. Participants were recruited from an opt-in online research company panel with the objective of recruiting a representative sample of adults across each LGA. The Geller typology classified individuals as either: ‘Strong and Fearless’, ‘Enthusied and Confident’, ‘Interested but Concerned’, or ‘No Way No How’. ‘Interested but Concerned’ participants are those that would ride a bike if protected infrastructure were provided.

**Results:** The survey was completed by 3999 individuals. Most participants owned a bike (58%), however only 20% rode at least once per week. The distribution of the Geller groups was: ‘Strong and Fearless’ (3%), ‘Enthusied and Confident’ (3%), ‘Interested but Concerned’ (78%), and ‘No Way No How’ (16%). While variation in the distributions of the Geller groups was observed between LGAs within Greater Melbourne, the ‘Interested but Concerned’ group, reflecting people who are comfortable riding only in protected lanes or off-road paths, was high across all LGAs and all demographic sub-groups. Even though the frequency of riding a bike was lower in women, interest in riding a bike was high and comparable to men. Participants who resided in the outer urban fringe regions of Greater Melbourne had high interest, but low participation in bike riding.

**Conclusions:** While there was variation in interest in bike riding across an entire metropolitan region and across population groups, interest was high across all areas and demographics. Our results show the potential for substantial increases in cycling participation, but only when high-quality cycling infrastructure is provided. Further research is required to understand the policy and practice barriers to equitable provision of protected infrastructure.

**NOTE:** This preprint reports new research that has not been certified by peer review and should not be used to guide clinical practice.

## 35 INTRODUCTION

36 Increasing participation in bike riding is well established as being beneficial for public health, the  
 37 environment and traffic congestion (1-5). The majority of populated areas of Australia exhibit ideal  
 38 conditions for riding a bicycle, including relatively flat topography and in most areas, a mild climate. Despite  
 39 this, participation in bike riding remains low in Australia compared to other international settings (6). To  
 40 increase bike riding participation and to ensure that planning and practice efforts are targeted to the whole  
 41 community, there is a need to identify specific sub-groups of the population that can be classified as the  
 42 bike riding 'near-market'; individuals who would like to start riding a bike. Bike rider typologies are  
 43 commonly used to achieve this, by segmenting populations into distinct groups with shared characteristics.

44 The most commonly used bicyclist typology is the 'Four Types of Cyclist' typology, first introduced in 2006  
 45 by Roger Geller (7) and later refined by Dill & McNeil (8). This classifies people into one of four groups  
 46 based on their confidence to ride a bike in various infrastructure types, their interest in riding a bike and if  
 47 they had ridden a bike in the past month. One of the four categories are people who are 'Interested but  
 48 Concerned'. Interested but Concerned participants are those that would ride a bike if protected  
 49 infrastructure were provided. The typology has been used to quantify potentially latent groups of bicyclists  
 50 in cities, states, and countries. While the use of typologies to quantify the near-market of bicyclists across  
 51 large cities and regions has been helpful in informing bike riding strategies, prior studies have not explored  
 52 whether interest in bike riding varies within these geographies, such as across smaller spatial areas of cities  
 53 and states (8-11). The availability and quality of transport infrastructure often varies within cities  
 54 depending on zoning, distance from the city, topography, socioeconomic status and community  
 55 demographics (12-14). Identifying interest in bike riding at this small spatial scale is useful in understanding  
 56 geographical variation in bike riding potential and how protected infrastructure can be implemented to  
 57 maximise bike riding participation and address inequities in participation and infrastructure. To our  
 58 knowledge, previous literature has not quantified the Geller typology groups at a spatial scale smaller than  
 59 cities, and has not been applied in Australia.

In this study, we aimed to quantify and identify the characteristics of the ‘Four Types of Cyclist’ in all Local Government Areas (LGAs) within Greater Melbourne, and a selection of regional centres in the state of Victoria, Australia.

## **METHODS**

### **Study design**

We conducted a cross-sectional online survey in the state of Victoria, Australia. The objective was to recruit a representative sample of adults (aged 18 years and older) across each local government area. Data collection occurred over the period of August 12<sup>th</sup> to September 10<sup>th</sup>, 2020. Data collection occurred during a period of restrictions due to the COVID-19 pandemic. Many Victorian workplaces were closed and physical distancing was enforced (15), but there were no restrictions placed on leaving the home during this period.

In line with values-based messaging for health promotion (16), we adopted the term “bike riding” rather than “cycling”, and their equivalents, in this study to ensure inclusivity and avoid association with competitive cycling (17).

### **Setting**

Victoria has a population of 6.7 million (18) of which 67% reside in the Greater Melbourne area (19). As of 2018, bike riding comprised 3% of all weekday trips in metropolitan Melbourne (20). LGAs were chosen as the geographical area for analysis. LGAs in Australia are defined subdivisions of states that are under the jurisdiction of a particular Local Government (21). In Victoria, 85% of the road network is made up of local roads, which are maintained by Local Governments (22). For this reason, Local Governments play an essential role in the planning and maintenance of bicycling infrastructure. Data were collected in each LGA within Greater Melbourne (n=31) and select regional LGAs (n=6) (**Error! Reference source not found.**).

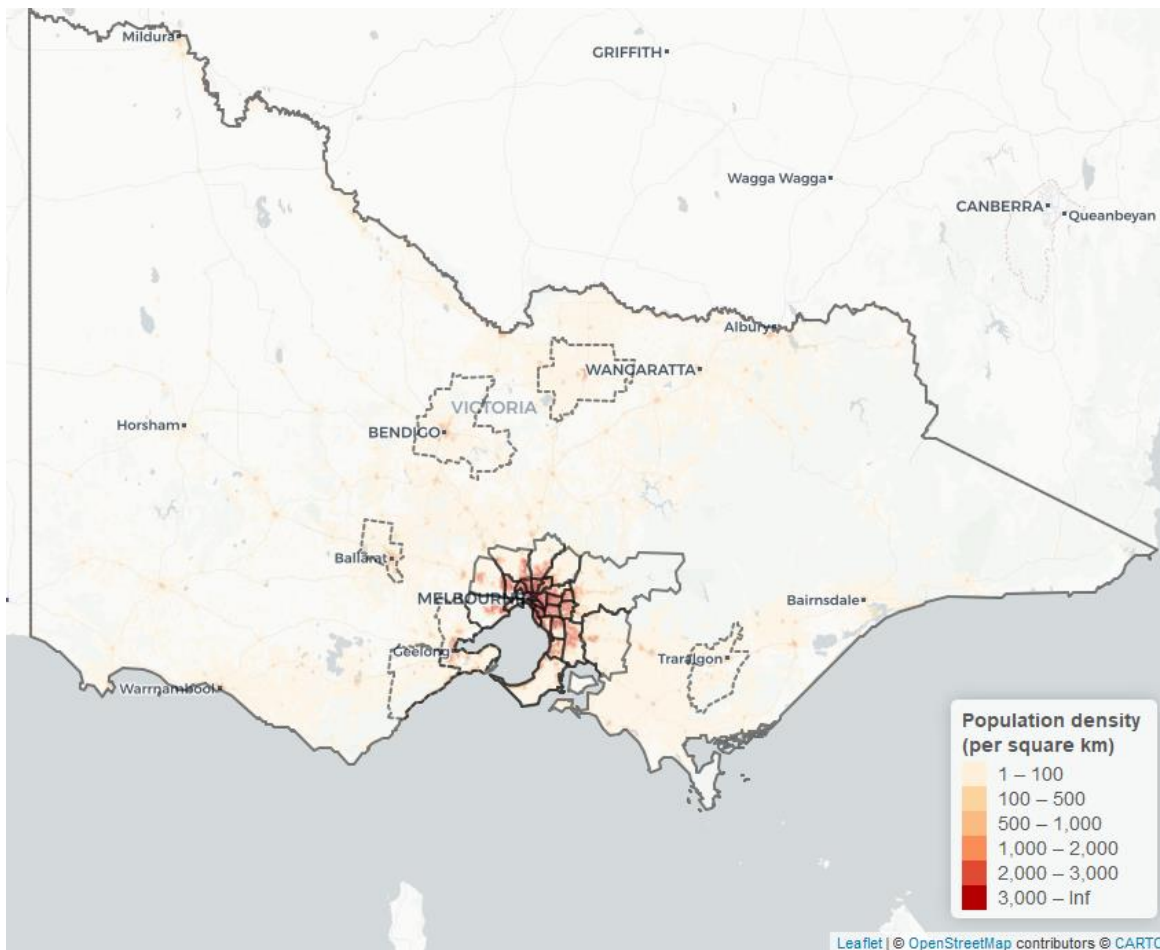

Figure 1. Map of included LGAs and population density within the state of Victoria (Regional LGAs = dotted border, Greater Melbourne LGAs = solid border)

Greater Melbourne LGAs were chosen specifically due to the high density of population (see Figure 1, Figure 2), and potential to improve bike riding participation rates and infrastructure. Similarly, data were collected in six regional centres with higher populations, higher population density and relatively flat topography. These areas also had the potential for increased participation in bike riding. Achieving a representative sample in rural/regional LGAs other than those selected was not feasible due to small survey panel sizes in these regions.

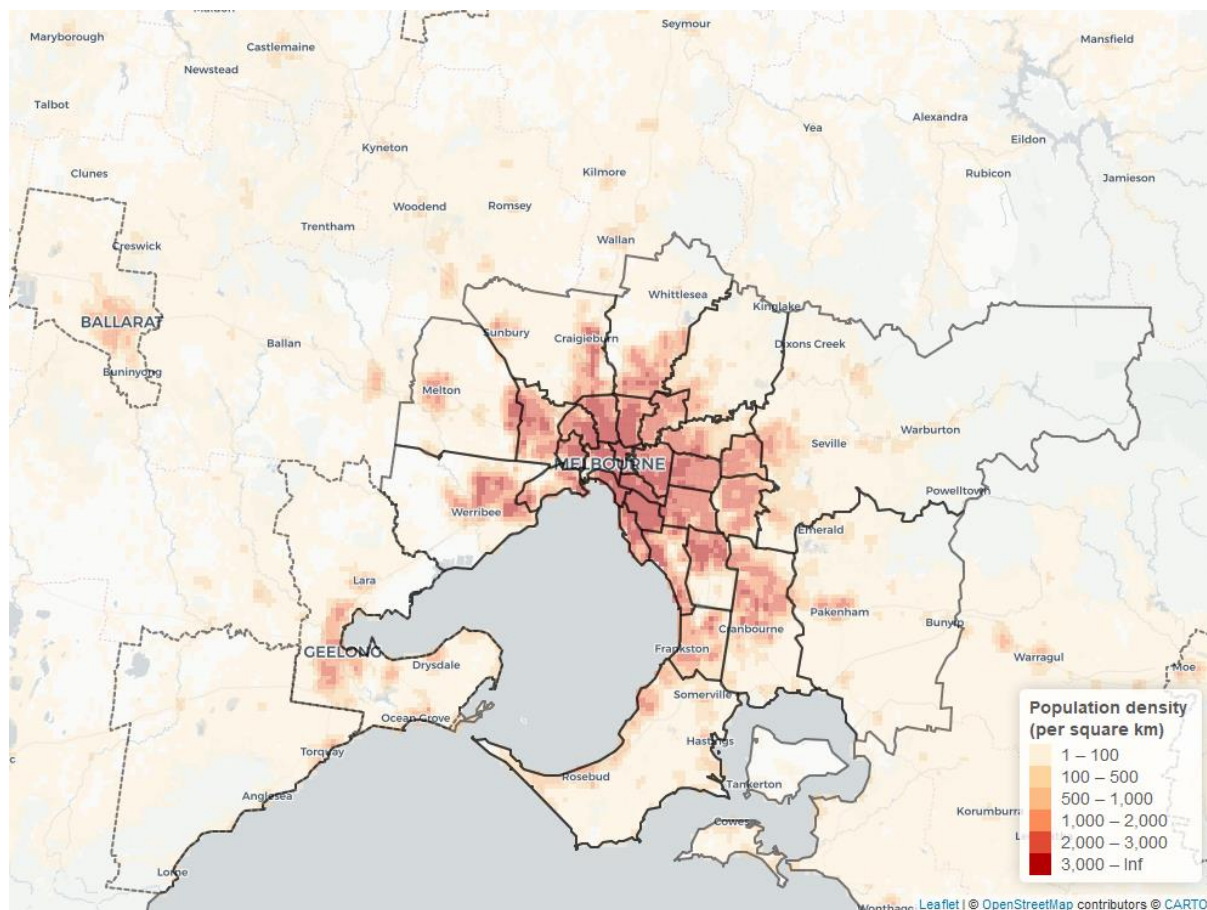

Figure 2. Map of population density in Greater Melbourne (Greater Melbourne LGAs = solid line, Regional LGAs = dotted line)

## Survey design

A cross-sectional online survey was developed by the study authors, and administered through Qualtrics Survey Software (23). The full survey is provided as Supplementary Material A. The survey included questions about demographics, bike riding frequency and behaviours, and a set of questions to categorise participants into one of the four Geller cycling topologies (7, 8). The Geller typology uses descriptions and illustrations of a variety of street environments, levels of bike riding infrastructure and traffic speeds and asks participants how comfortable they would be riding a bike in those conditions on a 4-point Likert scale, from 1 = “Very uncomfortable” to 4 = “Very comfortable”. Participants are also asked their level of agreement with the statement “I would like to cycle more”, with a 4-point Likert scale from 1 = “Strongly disagree” to 4 = “Strongly agree”. The answers to these scenarios distinguish which of the four bike riding typologies the participant belongs to. Groups consist of people who are “Strong and Fearless”, “Enthusied and Confident”, “Interested but Concerned” or “No Way No How”. Strong and Fearless participants are

105 comfortable riding a bike on any infrastructure, including on roads with no protected bicycling  
 106 infrastructure. Enthused and Confident participants are comfortable on non-residential streets with painted  
 107 on-road bike lanes (separating bikes from traffic without protection). Interested but Concerned participants  
 108 are comfortable riding a bike on protected bicycling infrastructure only, while No Way No How participants  
 109 are not comfortable riding a bike in any setting.

110 Adaptations were made to the Geller Typology for use in Australia. These included the conversion of miles  
 111 per hour to kilometres per hour, and change of the term “striped bike lane” to “painted bike lane”. Each  
 112 question included a figure to allow the participant to better understand the scenario and context (see  
 113 Figure 3). Photos were not used as to avoid associations with particular areas, or other factors that could  
 114 influence bike riding comfort. The Geller typology was chosen for this study for its ability to inform policy  
 115 and practice, and to allow for comparisons to studies in other settings that have used the same questions.  
 116 Questions regarding frequency of bike riding and trip purpose were asked from the perspective of before  
 117 COVID-19 restrictions were in place (see Supplementary Material).

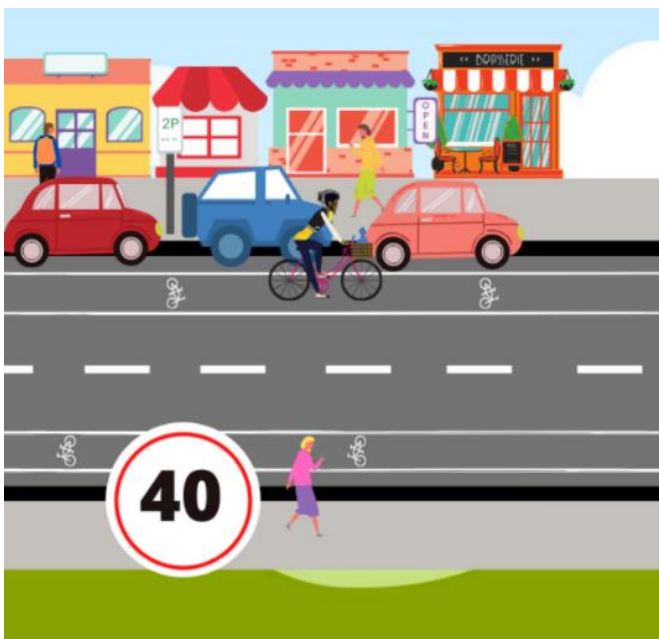

118

119 *Figure 3. Example image alongside Geller Typology questions - Question 3: “How comfortable would you feel riding a bike on a two-*  
 120 *lane commercial shopping street with traffic speeds of 30-40 km/h, on-street parking and a painted bike-lane?” Image developed by*  
 121 *the authors.*



Demographic data included age category (18-24 years, 25-34 years, 35-44 years, 45-64 years, 65-74 years, 75 and above years), gender (female, male, non-binary, other (contents specified by participant)), individual gross annual income from 2019 in \$AUD (\$1-\$10,399, \$10,400-\$20,799, \$20,800-\$31,199, \$31,200-\$41,599, \$41,600-\$51,999, \$52,000-\$64,999, \$65,000-\$77,999, \$78,000-\$103,999 and \$104,000 or more), whether the person spoke a language other than English at home, and Victorian postcode of residence. Postcodes do not form part of the Australian Statistical Geography Standard (24) and do not necessarily uniquely fit within a single LGA. Therefore, where a participant resided in a postcode bounded across multiple LGAs ( $n=79$  postcodes), they were directed to a map of their postcode with LGAs boundaries and asked to select the LGA they resided in.

### **Sampling and recruitment**

We recruited people 18 years of age or older who resided in one of the LGAs in Greater Melbourne or one of the six regional LGAs. The aim was to achieve a representative sample size within each LGA, so that typologies between LGAs could be compared. Sample size was calculated for each of the LGAs based on the 2016 Australian Bureau of Statistics Census 2016 data (25) and using a 95% confidence level and a 2% margin of error, totalling  $n = 3351$ . The survey was distributed online via email to a sample obtained from a market research company, The Online Research Unit (ORU). The ORU panels are built using a variety of recruitment methods to ensure adequate general population representation and reduce selection bias: through post, phone, print and online. Invitations were sent in batches from Monday to Friday, with more invitations being sent on Friday to take account of the longer time period over the weekend where no email invitations were sent. By sending the invitations in batches, this reduced bias towards early responders and minimised response bias by distributing responses over different days. Participants who had partially responded to the survey or not entered the survey were sent a maximum of two reminders over the data collection period to reduce non-response bias. In order to monitor the Victorian population sample representativeness, the ORU were sent daily reports for the age and gender distributions for the completed survey sample to date. Where particular groups were lower than the population, 'boosting' was performed by sending further invitations and reminders those demographics not meeting the required

proportions for sample representativeness. Age and gender representation at the LGA level was not possible to monitor due to restrictions on information sharing restrictions between the ORU and Monash University. Oversampling was performed for small LGA sub-populations to allow for more reliable estimates and to avoid sampling bias due to under-coverage. When sample sizes were achieved, no further invitations were sent to participants that resided in these areas.

## Statistical analysis

Responses were checked for duplicates, of which none were found. Completion times were checked for outliers to identify any responses completed in a time that was not feasible, and removed if so. Further cleaning of potentially straight-lined responses was not possible as these responses may have been valid. Results for the overall sample were weighted to reflect the correct population representation of each LGA to account for oversampling in any of the LGAs and to remove any sampling bias. Statistical analysis was performed in the statistical program R and the integrated development environment RStudio (26) using the *survey* library for analysis of weighted data (27). Survey demographic data were compared to the aggregate population data for each of the included LGAs from the 2016 Census (25), with the exception of data relating to speaking a language other than English at home. This was not available for the selected LGA populations, and instead was obtained from a separate report and based on the whole of the Victorian population (28). Maps of population density (Figure 1 and Figure 2) were produced based on Australian Bureau of Statistics population density data (29), using the *leaflet* package in R (26, 30).

Descriptive statistics and frequency tables of weighted data were used to describe the bike riding behaviours and frequency of each Geller Typology, and to make comparisons between age, gender and region of residence. Chi-square tests were used to examine differences in the distribution of the Geller Typology within age, income, and gender groups, and between Greater Melbourne and regional Victoria.

## Ethics

The project was approved by the Monash University Human Research Ethics Committee (Project ID: 25346).

## RESULTS



173 In total, 41,000 invitations and 20,000 reminders were sent by the ORU, with a response rate of 10%. Of the  
 174 4067 participants who started the survey, 3999 (98%) completed all sections and were included in the final  
 175 analysis. The age and gender of the weighted sample were generally consistent with the aggregated  
 176 population of the LGAs included in the study, with only the 65-74-year age group being 6.9% higher in the  
 177 sample than the target population (see Supplementary Materials C). The weighted sample had a higher  
 178 income than the target population, with 15% of participants earning over \$104,000 per year compared to  
 179 7.2% of the target population. In the sample, 12% spoke a language other than English at home, compared  
 180 to 26% in Victoria (see Supplementary Materials C).

181 Over half of all participants owned a bike (57%), however only 20% rode their bike at least once per week.  
 182 Of participants that rode their bike at least once a year, most rode for recreation only (72%).

183 Over three quarters of the sample (78%) were classified as Interested but Concerned, 2.8% as Strong and  
 184 Fearless, 3.2% as Enthused and Confident and 16% as No Way No How (see Figure 4). The Interested but  
 185 Concerned group comprised a higher proportion of women (48%) than the Strong and Fearless (28%) and  
 186 Enthused and Confident groups (25%) (Table 1). Over half of this group owned a bike (63%), and most rode  
 187 for recreation only (73%), and rode 1-3 times per year (31%). Twenty-six percent of participants in this  
 188 group had not ridden a bike in the past 12 months, showing a potentially latent group of bicyclists.

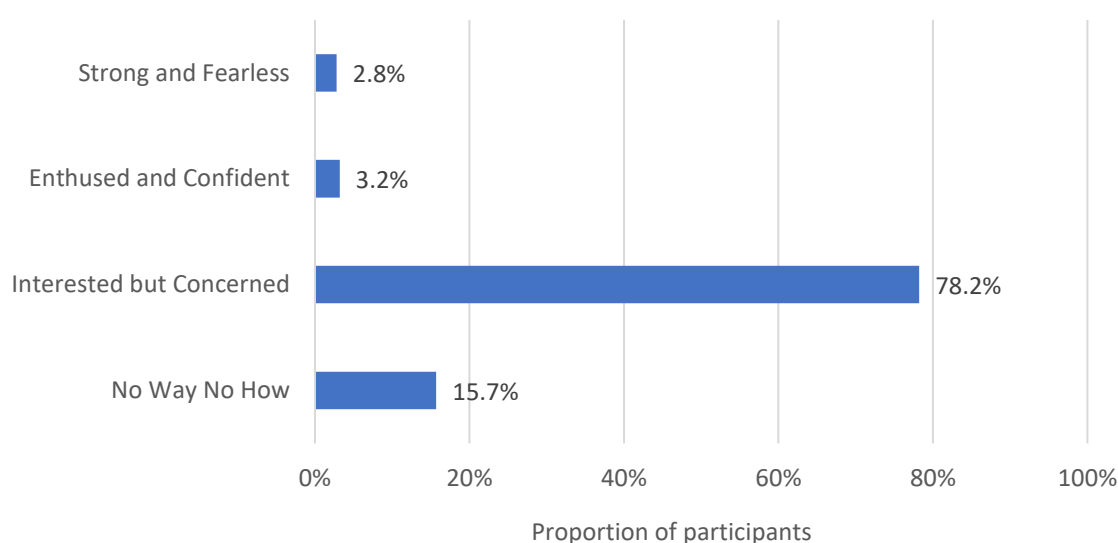

189  
 190 *Figure 4. Bar graph of the distribution of Geller groups across weighted study sample (n = 3999)*

191

192 Table 1. Geller Group characteristics based on sample weighted to the Victorian population (25)

|                                      | Strong and Fearless | Enthused and Confident | Interested but Concerned | No Way No How | Total Weighted Sample |
|--------------------------------------|---------------------|------------------------|--------------------------|---------------|-----------------------|
| <b>Proportion of weighted sample</b> | 2.8%                | 3.2%                   | 78.2%                    | 15.7%         | 100%                  |
| <b>Gender*</b>                       |                     |                        |                          |               |                       |
| Female                               | 28.0%               | 23.6%                  | 48.3%                    | 59.8%         | 49.1%                 |
| Male                                 | 71.1%               | 74.8%                  | 51.3%                    | 39.6%         | 50.5%                 |
| Non-binary                           | 0.9%                | 0.8%                   | 0.3%                     | 0.3%          | 0.3%                  |
| Other                                | 0.0%                | 0.0%                   | 0.0%                     | 0.0%          | 0.0%                  |
| Prefer not to say                    | 0.0%                | 0.8%                   | 0.1%                     | 0.3%          | 0.1%                  |
| <b>Age category</b>                  |                     |                        |                          |               |                       |
| 18 – 34 years                        | 31.7%               | 38.0%                  | 31.8%                    | 17.7%         | 33.0%                 |
| 35 – 54 years                        | 37.3%               | 34.3%                  | 33.1%                    | 20.3%         | 34.6%                 |
| 55 – 74 years                        | 30.1%               | 24.5%                  | 32.2%                    | 50.6%         | 24.0%                 |
| 75+ years                            | 0.9%                | 3.2%                   | 2.9%                     | 11.4%         | 8.4%                  |
| <b>Annual income</b>                 |                     |                        |                          |               |                       |
| \$1 - \$20,799                       | 11.1%               | 15.1%                  | 16.2%                    | 22.4%         | 32.6%                 |
| \$20,800 - \$41,599                  | 20.4%               | 14.0%                  | 19.1%                    | 30.3%         | 25.7%                 |
| \$41,600 - \$64,999                  | 16.8%               | 30.6%                  | 22.8%                    | 16.5%         | 20.1%                 |
| \$65,000 - \$103,999                 | 29.6%               | 21.2%                  | 26.8%                    | 21.0%         | 14.3%                 |
| \$104,000 +                          | 22.1%               | 19.1%                  | 15.1%                    | 9.9%          | 7.4%                  |
| <b>Bike ownership</b>                |                     |                        |                          |               |                       |
| Yes                                  | 70.6%               | 79.9%                  | 63.4%                    | 20.4%         | 57.3%                 |
| No                                   | 29.4%               | 20.1%                  | 36.6%                    | 79.6%         | 42.7%                 |
| <b>Frequency of bike riding</b>      |                     |                        |                          |               |                       |
| Never                                | 20.1%               | 8.5%                   | 25.6%                    | 76.1%         | 32.8%                 |
| 1 - 3 times per year                 | 15.2%               | 23.1%                  | 30.5%                    | 12.7%         | 27.1%                 |
| 1 - 3 times per month                | 15.5%               | 21.9%                  | 23.1%                    | 5.9%          | 20.1%                 |
| 1 - 3 times per week                 | 25.0%               | 24.0%                  | 15.7%                    | 4.3%          | 14.5%                 |
| 4 + days per week                    | 24.2%               | 22.4%                  | 5.0%                     | 0.9%          | 5.5%                  |
| <b>Primary trip purpose**</b>        |                     |                        |                          |               |                       |
| Transport                            | 11.9%               | 7.2%                   | 6.5%                     | 16.1%         | 7.3%                  |
| Recreation                           | 48.7%               | 51.7%                  | 73.4%                    | 72.9%         | 71.6%                 |
| Both                                 | 39.4%               | 41.1%                  | 20.1%                    | 11.0%         | 21.1%                 |

193 \*For the counts of participants who identified as “non-binary” or “other”, or reported “prefer not to say”, robust analysis could not  
194 be performed due to small sample sizes

195 \*\*based on participants who had ridden a bike in the 12 months previous to COVID-19 restrictions

## 196 Within Greater Melbourne comparisons

197 In Greater Melbourne, the Interested but Concerned group was consistently the largest group across all  
198 LGAs, ranging from 66% to 88% (Figure 5). Many of the LGAs on the outer-fringe area of Greater Melbourne  
199 had higher proportions of Interested but Concerned participants. The proportion of Strong and Fearless  
200 were low in all LGAs, ranging from 0.0 to 7.1%. Similarly, proportions of Enthused and Confident  
201 participants were low, ranging from 0.0% to 7.3%. Proportions of No Way No How participants ranged  
202 from 2.7% to 23%.

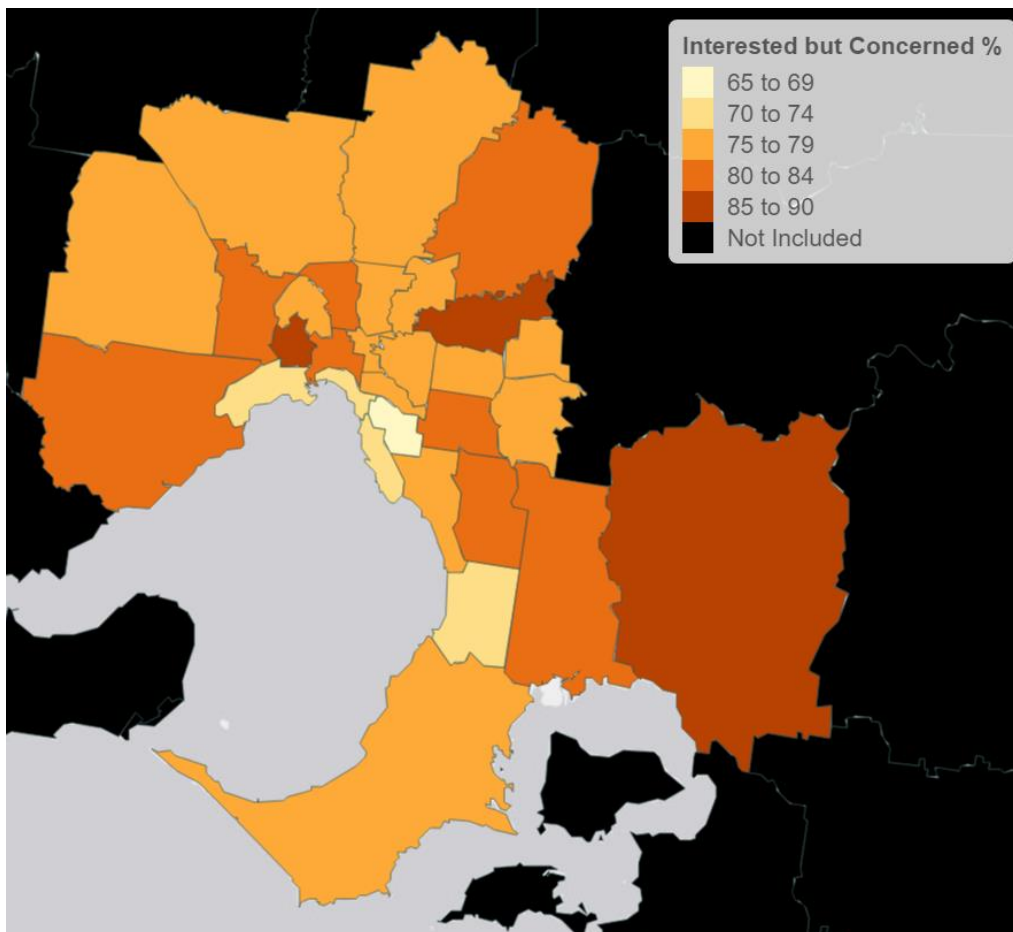

204 Figure 5. Heat map of Greater Melbourne showing the proportion of participants categorised as Interested but Concerned

205 Bike ownership was highest in the inner-West (67%), and lowest in inner-East areas, where in one LGA, only  
 206 40% of participants owned a bike. Participants who rode a bike at least once per week were most common  
 207 in the City of Melbourne (32%), and generally decreased with distance from the city (Figure 6).

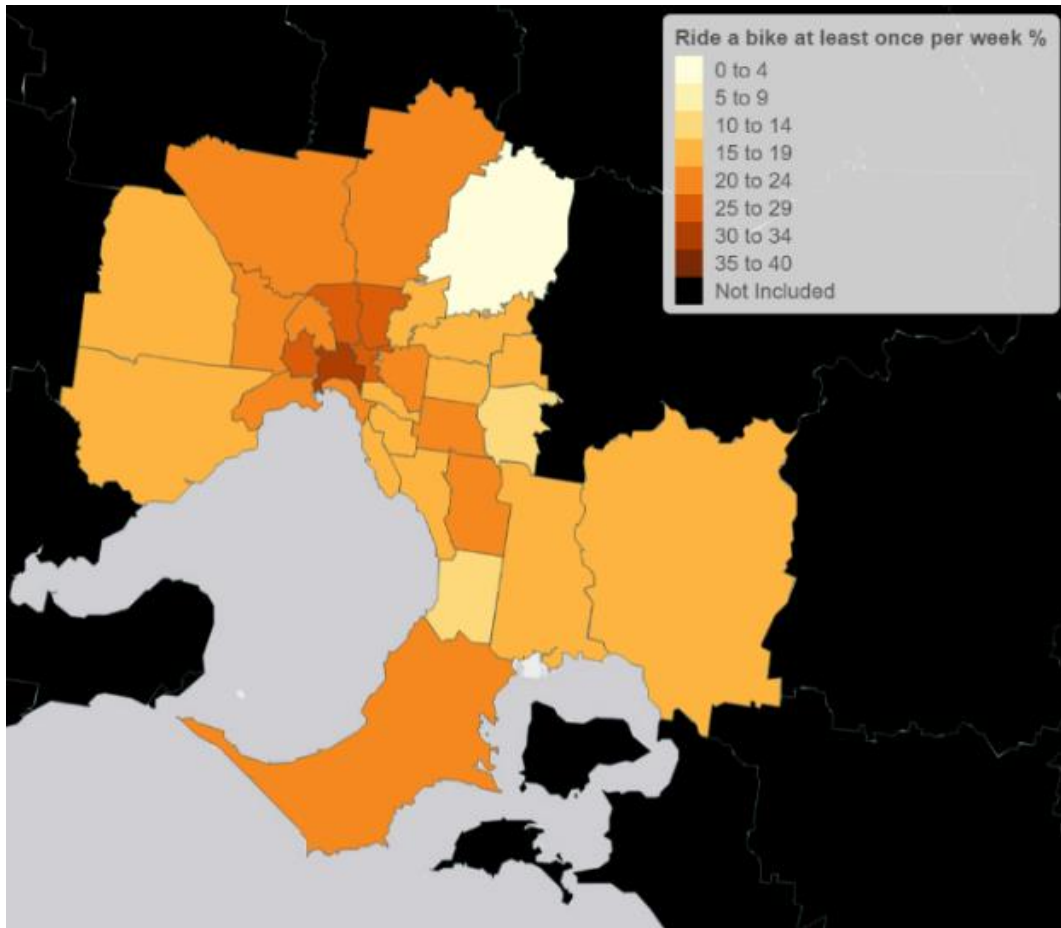

208  
 209 *Figure 6. Heat map of Greater Melbourne showing the proportion of participants who rode a bike at least once per week prior to*  
 210 *COVID-19 restrictions*

## 211 **Regional comparisons**

212 Proportions of Geller groups differed significantly between Greater Melbourne and regional Victorian LGAs  
 213 ( $\chi^2 = 19.4$ ,  $p = <0.001$ ). For both Greater Melbourne and regional Victorian LGAs, the Interested but  
 214 Concerned group made up the majority of the sample (79% and 71% respectively). A higher proportion of  
 215 participants were classified as No Way No How in regional Victoria (21%) than Greater Melbourne (15%),  
 216 however bike ownership was comparable between regional Victoria (60%) and Greater Melbourne (57%).  
 217 There was no association between how often participants rode a bike based on regionality ( $\chi^2 = 0.5$ ,  $p = 3.5$ )  
 218 (Supplementary Material C).

## 219 Age Comparisons

220 More than half of each sample were Interested but Concerned in all age groups (Figure 7). There was an  
 221 association between age group and the Geller distribution ( $\chi^2 = 214.7$ ,  $p = <0.001$ ). The proportion of  
 222 participants classified as Interested but Concerned was lower in participants aged 55-74 years (72%) and 75  
 223 or more years (55%) compared to participants aged 18-34 years (84%) and 35 to 54 years (83%). The  
 224 proportion of participants classified as No Way No How was highest in participants aged 75 years and older  
 225 (42%) and 65-74 years (28%).

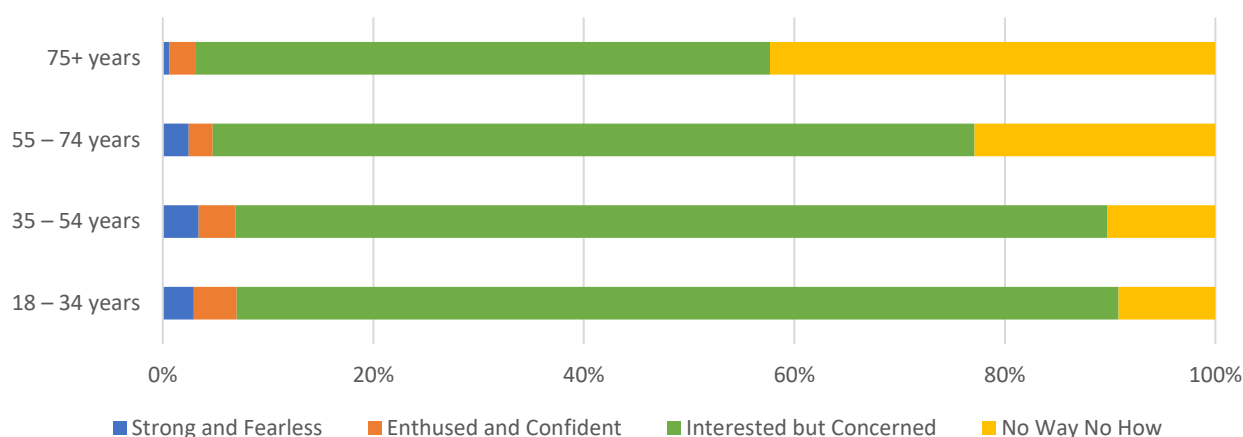

226

227 *Figure 7. Distribution of Geller groups within age categories (weighted)*

## 228 Gender comparisons

229 A higher proportion of men than women in the sample owned a bike (63% vs. 52%), rode a bike at least  
 230 once per week (28% vs. 12%) and rode a bike solely for transport (8.3% vs. 5.9%). The distribution of Geller  
 231 groups differed between women and men ( $\chi^2=79.7$ ,  $p=<0.001$ ) (see Figure 8). While the proportion of No  
 232 Way No How participants was higher in women (19% vs 12%) and the proportion of Strong and Fearless  
 233 (1.6% vs 4.0%) and Enthused and Confident (1.6% vs 4.7%) participants were lower in women, the  
 234 proportion classified as Interested but Concerned was comparable in both women (78%) and men (79%).

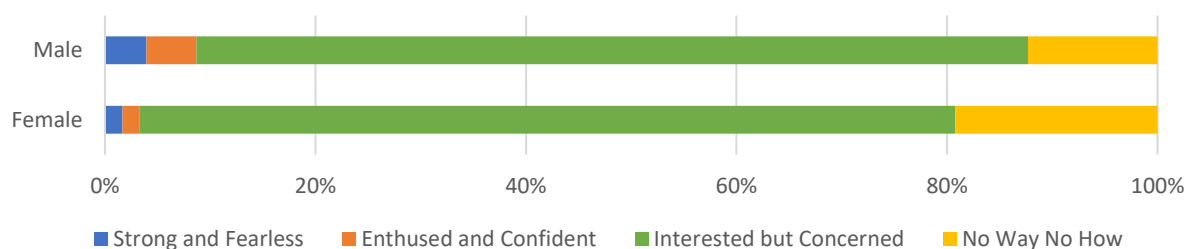

Figure 8. Distribution of Geller groups by gender (weighted)

## Income comparisons

A higher proportion of participants in the lower income groups (\$1 - \$20,799/year and \$20,800 - \$41,599/year) rode a bike more for transport, and a greater proportion rode four or more days per week than any other income groups. High income groups had the highest proportion of recreational bike riding (78% in participants earning \$104,000 or more per year), and highest proportion of participants riding a bike 1-3 times per week (7.1% in \$65,000 - \$103,999/year group).

The proportion of Interested but Concerned participants ranged from 73% in the \$20,800 - \$41,599 income group to 82% in the \$41,600 - \$64,999 income group. The highest proportion of Strong and Fearless participants (4.2%) was in the group earning \$104,000 per year or more (Figure 8 and Supplementary Material C).

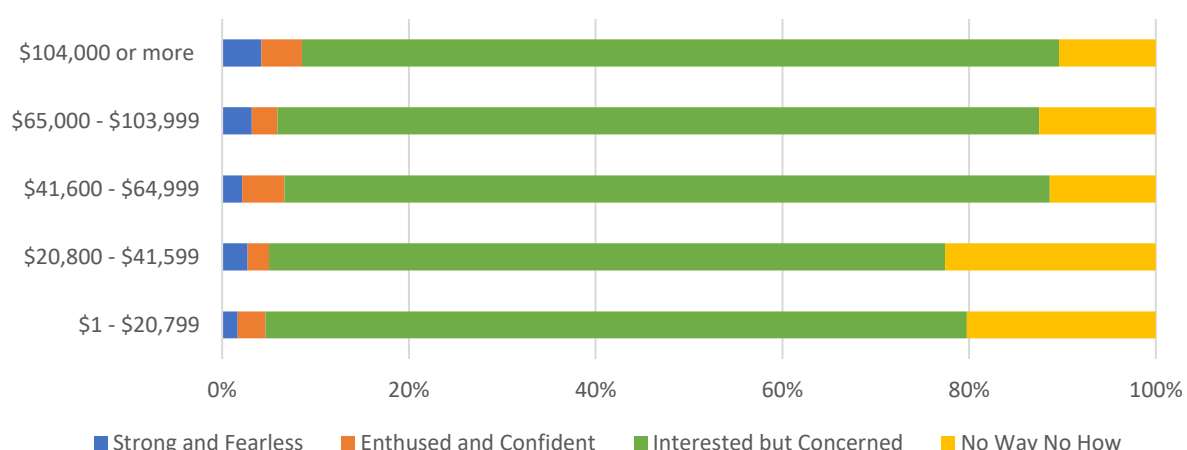

Figure 8. Distribution of Geller groups by gross income group (weighted)



## 250 DISCUSSION

251 There is currently no data available on how interest in riding a bike differs between geographical regions,  
 252 and no data on the Geller typologies in Australia. This study quantified the proportion of each Geller  
 253 typology group across 37 LGAs in Victoria, Australia with complete data from 3999 individuals. Over half of  
 254 participants owned a bike, however only one in five rode a bike at least once per week. Most participants  
 255 were classified as Interested but Concerned, demonstrating a high latent demand for bike riding if  
 256 protected bicycling infrastructure were provided. Geller group distributions differed between LGAs within  
 257 Greater Melbourne, and between regional and metropolitan areas, supporting the need for analysis of  
 258 Geller groups at smaller spatial scales than cities or states.

259

260 Few studies have used original research to identify the Geller typology proportions (8-11). Two sentinel  
 261 Geller papers from the US (7, 8), one of which is published research, are often extrapolated to local  
 262 government and state planning strategies in other areas (6, 31-34). Original research to identify Geller  
 263 typology proportions has been conducted in the United States; including Portland (8, 9), Austin (9), Chicago  
 264 (9), San Francisco (9), Washington D.C. (9), and in Edmonton, Canada (10). At times, these findings are  
 265 applied to settings outside of where the data were collected. For example, the original paper from Roger  
 266 Geller (7), based in Portland in the United States, has been cited in the Victorian Cycling Strategy in  
 267 Australia (6). Research conducted in this area suggests 58% of people living in Portland are Interested but  
 268 Concerned (8). Our Victorian-specific data demonstrates a far higher proportion classified as Interested but  
 269 Concerned (78%).

270

271 Previous published studies using the Geller Typology to quantify interest in bike riding have done so at a  
 272 multi-city, state and city level (8-11). To the authors' knowledge, our study is the first to quantify the Geller  
 273 typology proportions at a smaller spatial scale. We found that interest and confidence in riding a bike  
 274 ranged from 66% to 88% within the metropolitan area of Greater Melbourne. These differences may come  
 275 from differing available infrastructure, the demographics of an area, trip distance to central hubs and

276 physical setting (e.g. topography, primary land-use type) (35, 36). Further, it is important to identify these  
 277 variations to understand the interest across areas with substantially different availability of bicycle  
 278 infrastructure. While variation in Geller typologies was observed across Greater Melbourne, one of the  
 279 most important findings was that interest in bike riding was consistently high, including in outer urban  
 280 fringe regions of Greater Melbourne, revealing a high latent demand across a vast geographical area of an  
 281 entire metropolitan region. Currently, however, bicycling infrastructure is concentrated in inner-Melbourne  
 282 to support higher volumes of bike traffic (12, 13). Therefore, bicycling infrastructure is not equitably  
 283 provided across differing regions of Greater Melbourne (12, 13), likely contributing to both transport  
 284 inequities (38), and health inequities through reduced physical activity participation (39) and a potentially  
 285 increased risk of injury (40-44). The provision of protected bicycling infrastructure has the potential to  
 286 address these inequities and support a potentially latent population of bike riders living in the outer urban  
 287 fringe regions of Greater Melbourne (45-51). This would further enable current recommendations in  
 288 Greater Melbourne of the “20-minute-neighbourhood” model, that supports people to meet most of their  
 289 daily needs within a 20-minute trip from home (by walking, riding a bike or using public transport) (52). To  
 290 inform the provision of locally-specific infrastructure, additional research is required to better understand  
 291 trip purposes in outer urban fringe regions, and if they are focussed on transport to inner-city areas, or are  
 292 for accessing local hubs and public transportation.

293

294 Women are often under-represented in bike riding campaigns and popular culture due to lower  
 295 participation, and the perspective of bike riding being a male-dominated activity (17, 53, 54). Despite low  
 296 participation, over two thirds of women in this study were interested in riding a bike. Importantly, many  
 297 existing bike riding environments are often designed for the needs and confidence levels of able-bodied  
 298 men (55-57). Infrastructure that enables women to ride a bike includes off-road paths, and bike-  
 299 infrastructure that is physically separated from motor-vehicle traffic (55, 58). In future urban planning and  
 300 research, it is vital that a lack of participation is not seen as a lack of interest in bike riding. Understanding

301 the barriers to riding a bike for women, who are often under-represented in the bike riding community is  
302 important to increasing participation.

303

304 In this study, a higher proportion of people in the lower income categories rode a bike for transport  
305 purposes, and rode four or more days per week, compared to people in the higher income groups. Similar  
306 findings have been shown both in Australia and internationally, where there was an association between  
307 increased household income, and a decreased proportion of people riding a bike for transport (12, 59, 60).  
308 People in lower income groups may ride a bike out of necessity for commuting, rather than as a  
309 recreational activity. Despite this, people living in areas of lower socioeconomic status have  
310 disproportionately lower access to bicycling infrastructure (14, 61, 62). In Melbourne, much of the  
311 protected bicycling infrastructure are off-road paths located in parks, along rivers as trails, often in inner-  
312 city, higher socioeconomic areas (12, 13), with similar patterns internationally (14, 61-63). To support lower  
313 income groups in bicycle-commuting and reduce health inequities faced by low socioeconomic groups,  
314 high-quality and protected bicycling infrastructure should be provided equitably to support local travel and  
315 connections with public transport.

316

317 The provision of separated bicycling infrastructure is important for both the safety (64) and support of low  
318 risk bicycling environments to maintain and encourage participation. While painted bike lanes are a lower  
319 cost alternative to providing bicycling infrastructure, these do not constitute physically separated bicycling  
320 infrastructure. Research conducted in Melbourne that measured passing distances between motor vehicles  
321 and bikes identified more close, and potentially unsafe, passes when a person riding a bike was travelling in  
322 a painted bike lane compared to on-road (65). Similarly, a previous study identified that 22% of all on-road  
323 bike riding crashes occurred while riding in a painted bike lane, highlighting their insufficiency in protecting  
324 vulnerable road-users (66). In addition to the risk of substantial injury that painted bike lanes pose for  
325 people on bikes, they are not supportive of new bike riders, or low-stress traffic environments, with  
326 concerns about safety on the road and interactions with motorists being a major barrier to participation in

bike riding (17, 67-70). Removing interactions with motor vehicles through a physically separated bicycle lane could substantially increase participation in bike riding in Melbourne, while maintaining the safety of vulnerable road-users.

To our knowledge, this was the first study of Geller typologies in Australia, and the largest and most population-representative for trip purpose and bike riding frequency. Further, this was the first application of the Geller typology at a small spatial scale, demonstrating important differences between local government areas. Despite this, some limitations were present. A recently published mixed methods study raised concerns over the internal validity of the Geller typology, particularly that the category participants were assigned to did not always represent their confidence in riding a bike (71). However, this typology was used because of its ease of understanding with policy makers, and to enable comparisons to existing literature and government bike riding strategies. Additionally, using an online research company may have favoured participants with a higher income, with computer access, and whom are able to regularly check their email, potentially introducing selection and response bias. To reduce response bias, invitations to complete the survey were sent in batches and at different times during the week. This enabled people who may have been occupied on certain days to receive a notification about the survey. As recommended by Hay et al., convenience internet panels are useful when data can be weighted to compensate for coverage errors (72). Some regional LGAs in this study had a low number of research company panel members. In turn, only a small number of participants completed surveys and represented the population in those LGAs. To reduce potential coverage errors, whole sample results were weighted by the population size of each LGA in an effort to balance the effects of under and over sampling across LGAs.

## CONCLUSION

To our knowledge, this study was the first application of the Geller typology groups at a small geographical area level. We demonstrated that while there was variation in interest in bike riding across an entire metropolitan region, interest was high across all LGAs, including outer urban areas that currently have lower participation in bike riding. Similarly, despite participation in bike riding being lower in women,

353 interest remained high. It is vital that a lack of participation is not seen as a lack of interest in bike riding.  
 354 These findings are important in considering the role that bike riding can play in reducing health and  
 355 transport inequities and how protected bicycling infrastructure can be implemented to address these  
 356 inequities. Further research is required to identify what factors are preventing people in Victoria from  
 357 riding a bike and how these barriers vary across geographical areas.

## 358 **ACKNOWLEDGEMENTS**

359 The authors would like to acknowledge the contribution of the participants in this study.

## 360 **FUNDING**

361 This research was funded by Victorian Health Promotion Foundation (VicHealth). Lauren Pearson receives a  
 362 Research Training Program Stipend from the Australian Government as a part of her PhD. Ben Beck was  
 363 supported by an Australian Research Council Discovery Early Career Researcher Award Fellowship  
 364 (DE180100825). Belinda Gabbe was supported by an Australian Research Council Future Fellowship  
 365 (FT170100048).

## 366 REFERENCES

- 367 1. Oja P, Titze S, Bauman A, De Geus B, Krenn P, Reger-Nash B, et al. Health benefits of cycling: a  
368 systematic review. Scand J Med Sci Sports. 2011;21(4):496-509.
- 369 2. Warburton DE, Nicol CW, Bredin SS. Health benefits of physical activity: the evidence. Cmaj.  
370 2006;174(6):801-9.
- 371 3. Rabl A, De Nazelle A. Benefits of shift from car to active transport. Transport policy.  
372 2012;19(1):121-31.
- 373 4. Pérez K, Olabarria M, Rojas-Rueda D, Santamariña-Rubio E, Borrell C, Nieuwenhuijsen M. The  
374 health and economic benefits of active transport policies in Barcelona. Journal of Transport & Health.  
375 2017;4:316-24.
- 376 5. Litman T. Evaluating active transport benefits and costs: Victoria Transport Policy Institute; 2015.
- 377 6. The Victorian Health Promotion Foundation. Victorian Cycling Strategy 2018-28. In: Department of  
378 Transport, Melbourne, Australia, 2017.
- 379 7. Geller R. Four Types of Cyclists. Portland, OR: Portland Office of Transportation; 2006.
- 380 8. Dill J, McNeil N. Four types of cyclists? Examination of typology for better understanding of  
381 bicycling behavior and potential. Transportation Research Record. 2013;2387(1):129-38.
- 382 9. McNeil N, Monsere CM, Dill J. Influence of bike lane buffer types on perceived comfort and safety  
383 of bicyclists and potential bicyclists. Transportation Research Record: National Research Council; 2015. p.  
384 132-42.
- 385 10. Cabral L, Kim AM. An empirical reappraisal of the four types of cyclists. Transportation Research  
386 Part A: Policy and Practice. 2020;137:206-21.
- 387 11. Dill J, McNeil N. Revisiting the four types of cyclists: findings from a national survey. Transportation  
388 research record. 2016;2587(1):90-9.
- 389 12. Pistoll C, Goodman A. The link between socioeconomic position, access to cycling infrastructure and  
390 cycling participation rates: An ecological study in Melbourne, Australia. Journal of Transport & Health.  
391 2014;1(4):251-9.



- 392 13. Kamphuis C, Giskes K, Kavanagh AM, Thornton L, Thomas LR, van Lenthe FJ, et al. Area variation in  
393 recreational cycling in Melbourne: a compositional or contextual effect? J Epidemiol Community Health.  
394 2008;62(10):890-8.
- 395 14. Braun LM, Rodriguez DA, Gordon-Larsen P. Social (in) equity in access to cycling infrastructure:  
396 Cross-sectional associations between bike lanes and area-level sociodemographic characteristics in 22 large  
397 US cities. Journal of transport geography. 2019;80:102544.
- 398 15. Health and Human Services, Victorian State Government. Victoria's restriction levels. 2020.
- 399 16. VicHealth. Values-based messaging for health promotion n.d. [Available from:  
400 <https://www.vichealth.vic.gov.au/media-and-resources/hpcomms>.
- 401 17. Daley M, Rissel C. Perspectives and images of cycling as a barrier or facilitator of cycling. Transport  
402 policy. 2011;18(1):211-6.
- 403 18. Australian Bureau of Statistics. National, state and territory population 2020 [Available from:  
404 [https://www.abs.gov.au/statistics/people/population/national-state-and-territory-population/latest-](https://www.abs.gov.au/statistics/people/population/national-state-and-territory-population/latest-release#states-and-territories)  
405 [release#states-and-territories](https://www.abs.gov.au/statistics/people/population/national-state-and-territory-population/latest-release#states-and-territories).
- 406 19. Australian Bureau of Statistics. 2016 Census QuickStats - Greater Melbourne. 2016.
- 407 20. Victorian Integrated Survey of Travel & Activity (VISTA). Total journeys to work by region and mode.  
408 2018.
- 409 21. Australian Bureau of Statistics. 1270.0.55.003 - Australian Statistical Geography Standard (ASGS):  
410 Volume 3 - Non ABS Structures, July 2016.
- 411 22. Vic Councils. Roads & transport. n.d.
- 412 23. Qualtrics. Qualtrics. Provo, Utah, USA 2005.
- 413 24. Australian Bureau of Statistics. Australian Statistical Geographical Standard (ASGS). 2011.
- 414 25. Australian Bureau of Statistics. 2016 Census Canberra, ACT, Australia 2016 [Available from:  
415 <https://www.abs.gov.au/websitedbs/censushome.nsf/home/2016>.
- 416 26. RStudio Team. RStudio: Integrated Development for R. . Boston, MA: RStudio, PBC; 2020.
- 417 27. Lumley T. Package 'Survey.' 2015 [Available from: [http://cran.r-](http://cran.r-project.org/web/packages/survey/survey.pdf)  
418 [project.org/web/packages/survey/survey.pdf](http://cran.r-project.org/web/packages/survey/survey.pdf).

- 419 28. Australian Bureau of Statistics. Census of Population and Housing, 2016, 2011 and 2006. 2018.
- 420 29. Australian Bureau of Statistics. 3218.0 Regional Population Growth, Australia, 2017-2018. 2019.
- 421 30. Graul C. leafletR: Interactive Web - Maps Based on the Leaflet JavaScript Library. R package version  
422 0.4-0, 2016.
- 423 31. Transportation CDo. Chicago Streets for Cycling Plan 2020. Chicago Department of Transportation  
424 Chicago IL; 2012.
- 425 32. Olson J, Goff P, Piper S, Zeftling L, Buffalo G. Buffalo Bicycle Master Plan Update. New York State  
426 Energy Research and Development Authority; 2016.
- 427 33. City of Burlington. Cycling Master Plan. 2009.
- 428 34. Mississauga. Mississauga Cycling Master Plan. 2019.
- 429 35. Winters M, Brauer M, Setton EM, Teschke K. Built environment influences on healthy  
430 transportation choices: bicycling versus driving. J Urban Health. 2010;87(6):969-93.
- 431 36. Winters M, Brauer M, Setton EM, Teschke K. Mapping bikeability: a spatial tool to support  
432 sustainable travel. Environment and Planning B: Planning and Design. 2013;40(5):865-83.
- 433 37. Nykiforuk CI, Flaman LM. Geographic information systems (GIS) for health promotion and public  
434 health: a review. Health Promot Pract. 2011;12(1):63-73.
- 435 38. Lee RJ, Sener IN, Jones SN. Understanding the role of equity in active transportation planning in the  
436 United States. Transport reviews. 2017;37(2):211-26.
- 437 39. Goodman A, Sahlqvist S, Ogilvie D, iConnect C. New walking and cycling routes and increased  
438 physical activity: one- and 2-year findings from the UK iConnect Study. Am J Public Health. 2014;104(9):e38-  
439 46.
- 440 40. Cicchino JB, McCarthy ML, Newgard CD, Wall SP, DiMaggio CJ, Kulie PE, et al. Not all protected bike  
441 lanes are the same: Infrastructure and risk of cyclist collisions and falls leading to emergency department  
442 visits in three US cities. Accident Analysis & Prevention. 2020;141:105490.
- 443 41. Reynolds CC, Harris MA, Teschke K, Cripton PA, Winters M. The impact of transportation  
444 infrastructure on bicycling injuries and crashes: a review of the literature. Environmental health.  
445 2009;8(1):1-19.

- 446 42. Teschke K, Frendo T, Shen H, Harris MA, Reynolds CC, Crompton PA, et al. Bicycling crash  
447 circumstances vary by route type: a cross-sectional analysis. BMC public health. 2014;14(1):1-10.
- 448 43. Teschke K, Harris MA, Reynolds CC, Winters M, Babul S, Chipman M, et al. Route infrastructure and  
449 the risk of injuries to bicyclists: a case-crossover study. Am J Public Health. 2012;102(12):2336-43.
- 450 44. Morrison CN, Thompson J, Kondo MC, Beck B. On-road bicycle lane types, roadway characteristics,  
451 and risks for bicycle crashes. Accident Analysis & Prevention. 2019;123:123-31.
- 452 45. Goodman A, Sahlqvist S, Ogilvie D, Consortium i. New walking and cycling routes and increased  
453 physical activity: one-and 2-year findings from the UK iConnect Study. Am J Public Health. 2014;104(9):e38-  
454 e46.
- 455 46. Panter J, Heinen E, Mackett R, Ogilvie D. Impact of new transport infrastructure on walking, cycling,  
456 and physical activity. American journal of preventive medicine. 2016;50(2):e45-e53.
- 457 47. Heinen E, Panter J, Mackett R, Ogilvie D. Changes in mode of travel to work: a natural experimental  
458 study of new transport infrastructure. International Journal of Behavioral Nutrition and Physical Activity.  
459 2015;12(1):1-10.
- 460 48. Mölenberg FJ, Panter J, Burdorf A, van Lenthe FJ. A systematic review of the effect of infrastructural  
461 interventions to promote cycling: strengthening causal inference from observational data. International  
462 journal of behavioral nutrition and physical activity. 2019;16(1):1-31.
- 463 49. Prins RG, Panter J, Heinen E, Griffin SJ, Ogilvie DB. Causal pathways linking environmental change  
464 with health behaviour change: Natural experimental study of new transport infrastructure and cycling to  
465 work. Prev Med. 2016;87:175-82.
- 466 50. Smith M, Hosking J, Woodward A, Witten K, MacMillan A, Field A, et al. Systematic literature review  
467 of built environment effects on physical activity and active transport—an update and new findings on health  
468 equity. International journal of behavioral nutrition and physical activity. 2017;14(1):1-27.
- 469 51. Pucher J, Dill J, Handy S. Infrastructure, programs, and policies to increase bicycling: an  
470 international review. Prev Med. 2010;50:S106-S25.
- 471 52. Department of Environment L, Water and Planning. Plan Melbourne 2017-2050. In: Department of  
472 Environment L, Water and Planning, Victorian State Government, editor. Melbourne, Australia 2017.

473 53. Bauman AE, Blazek K, Reece L, Bellew W. The emergence and characteristics of the Australian  
474 Mamil. Med J Aust. 2018;209(11):490-4.

475 54. Knight A. Cycling is the new golf. Sydney Morning Herald. 2014.

476 55. Aldred R, Elliott B, Woodcock J, Goodman A. Cycling provision separated from motor traffic: a  
477 systematic review exploring whether stated preferences vary by gender and age. Transport reviews.  
478 2017;37(1):29-55.

479 56. Mitra R, Nash S. Does the Built Environment Explain Gender Gap in Cycling? a Study of Post-  
480 Secondary Students in Toronto, Canada. Journal of Transport & Health. 2017;5:S24-S5.

481 57. Xie L, Spinney J. "I won't cycle on a route like this; I don't think I fully understood what isolation  
482 meant": A critical evaluation of the safety principles in Cycling Level of Service (CLOS) tools from a gender  
483 perspective. Travel behaviour and society. 2018;13:197-213.

484 58. Garrard J, Rose G, Lo SK. Promoting transportation cycling for women: the role of bicycle  
485 infrastructure. Prev Med. 2008;46(1):55-9.

486 59. Heesch KC, Giles-Corti B, Turrell G. Cycling for transport and recreation: associations with socio-  
487 economic position, environmental perceptions, and psychological disposition. Prev Med. 2014;63:29-35.

488 60. Xing Y, Handy SL, Mokhtarian PL. Factors associated with proportions and miles of bicycling for  
489 transportation and recreation in six small US cities. Transportation research part D: Transport and  
490 Environment. 2010;15(2):73-81.

491 61. Mora R, Truffello R, Oyarzún G. Equity and accessibility of cycling infrastructure: An analysis of  
492 Santiago de Chile. Journal of Transport Geography. 2021;91:102964.

493 62. Flanagan E, Lachapelle U, El-Geneidy A. Riding tandem: Does cycling infrastructure investment  
494 mirror gentrification and privilege in Portland, OR and Chicago, IL? Research in Transportation Economics.  
495 2016;60:14-24.

496 63. Tucker B, Manaugh K. Bicycle equity in Brazil: Access to safe cycling routes across neighborhoods in  
497 Rio de Janeiro and Curitiba. International journal of sustainable transportation. 2018;12(1):29-38.

- 498 64. Harris MA, Reynolds CC, Winters M, Cripton PA, Shen H, Chipman ML, et al. Comparing the effects  
499 of infrastructure on bicycling injury at intersections and non-intersections using a case–crossover design.  
500 Injury prevention. 2013;19(5):303-10.
- 501 65. Beck B, Chong D, Olivier J, Perkins M, Tsay A, Rushford A, et al. How much space do drivers provide  
502 when passing cyclists? Understanding the impact of motor vehicle and infrastructure characteristics on  
503 passing distance. Accident Analysis & Prevention. 2019.
- 504 66. Beck B, Stevenson M, Newstead S, Cameron P, Judson R, Edwards ER, et al. Bicycling crash  
505 characteristics: An in-depth crash investigation study. Accident Analysis & Prevention. 2016;96:219-27.
- 506 67. Heesch KC, Sahlqvist S, Garrard J. Gender differences in recreational and transport cycling: a cross-  
507 sectional mixed-methods comparison of cycling patterns, motivators, and constraints. International Journal  
508 of Behavioral Nutrition and Physical Activity. 2012;9(1):106.
- 509 68. Twaddle H, Hall F, Bracic B. Latent bicycle commuting demand and effects of gender on commuter  
510 cycling and accident rates. Transportation Research Record2010. p. 28-36.
- 511 69. Akar G, Clifton KJ. Influence of individual perceptions and bicycle infrastructure on decision to bike.  
512 Transportation Research Record2009. p. 165-72.
- 513 70. Dill J. Bicycling for transportation and health: the role of infrastructure. J Public Health Policy.  
514 2009;30 Suppl 1:S95-110.
- 515 71. Hosford K, Laberee K, Fuller D, Kestens Y, Winters M. Are they really interested but concerned? A  
516 mixed methods exploration of the Geller bicyclist typology. Transportation Research Part F: Traffic  
517 Psychology and Behaviour. 2020;75:26-36.
- 518 72. Hays RD, Liu H, Kapteyn A. Use of Internet panels to conduct surveys. Behavior research methods.  
519 2015;47(3):685-90.

520
