# Supplementary material for: The potential for bike riding across entire cities: quantifying spatial variation in interest in bike riding
Source: bioRxiv or medRxiv preprint supplement (doi:10.1101/2021.03.14.21253340), 2021-11-24
Supplement: Supplementary file [file media-1.pdf]

1 **SUPPLEMENTARY MATERIALS**

2 **Supplementary Material A - Study Survey**

3 Q1. What is your residential postcode? (if postcode that is on LGA boundary – referred to map)

4

5 Q2. What is your age?

6 • 18-24

7 • 25-34

8 • 35-44

9 • 45-64

10 • 65-74

11 • 75+

12

13 Q3. What gender do you identify as?

14 • Female

15 • Male

16 • Non-binary

17 • Prefer not to say

18 • Other (please specify)

19

20 Q4. Please indicate the answer that includes your personal income in 2019 before taxes.

21 • \$1 to \$10,399

22 • \$10,400 to \$20,799

23 • \$20,800 to \$31,199

24 • \$31,200 to \$41,599

25 • \$41,600 to \$51,999

26 • \$52,000 to \$64,999

27 • \$65,000 to \$77,999

28 • \$78,000 to \$103,999

29 • \$104,000 or more

30

31

32 Q5. Is English the main language you speak at home?

- 33 • Yes
- 34 • No (please specify)

35

36 Q6. Do you own a bike?

- 37 • Yes
- 38 • No

39

40 Q7. Do you have an injury or condition that prevents you from riding a bike?

- 41 • Yes
- 42 • No

43

44 Q8. Prior to COVID-19 restrictions, had you ridden a bike in the last 12 months?

- 45 • Yes
- 46 • No

47

48 *If "Prior to COVID-19 restrictions, had you ridden a bike in the last 12 months?" = Yes, directed to:*

49 Q8.1. Prior to COVID-19 restrictions, had you ridden a bike in the last month?

- 50 • Yes
- 51 • No

52

53 *If "Prior to COVID-19 restrictions, had you ridden a bike in the last month?" = Yes, directed to:*

54 Q8.2. Have you continued to ride a bike during COVID-19?

- 55 • Yes
- 56 • No

57

58 *If "Prior to COVID-19 restrictions, had you ridden a bike in the last 12 months?" = No OR "Prior to*  
59 *COVID-19 restrictions, had you ridden a bike in the last month?" = No, directed to:*

60 Q8.3. Have you begun riding a bike (or begun riding again) COVID-19?

- 61 • Yes

62 • No

63 Q9. Do you have any interest in riding a bike when COVID-19 restrictions are lifted?

64 • Yes

65 • Maybe

66 • No

67

68 Q10. Prior to COVID-19, how often did you ride a bike?

69 • Never

70 • 1-3 times per year

71 • 1-3 times per month

72 • 1-3 times per week

73 • 4+ days per week

74

75 *If "Prior to COVID-19, how often did you ride a bike?" was not "Never", directed to:*

76 Q10.1. When you ride a bike, for what purpose do you do so?

77 • Transport (e.g. to get to the shops, to work)

78 • Recreation (e.g. for exercise)

79 • Both transport and recreation

80

81 This section will ask you about how comfortable you would feel riding a bike in different settings.

82 Q11. How comfortable would you feel riding a bike on a path or trail separate from the street?

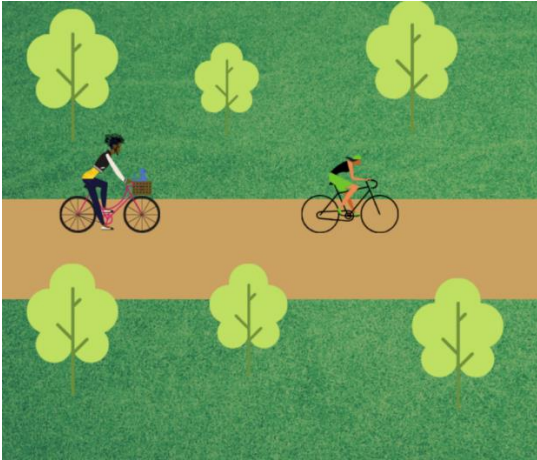

83

- Sliding scale – 1 (Very Uncomfortable) to 4 (Very Comfortable)

85

86

87 Q12. How comfortable would you feel riding a bike on a quiet, residential street with traffic speeds

88 of 30-40 km per hour?

89

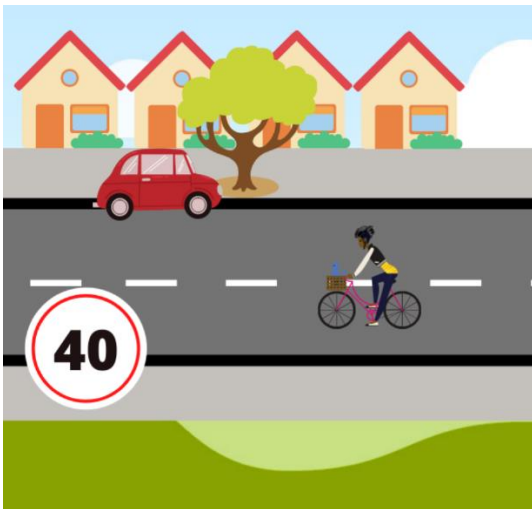

90

- Sliding scale – 1 (Very Uncomfortable) to 4 (Very Comfortable)

92

93 Q13. How comfortable would you feel on a quiet residential street with bicycle route markings, wide  
94 speed humps, and other things that slow down and discourage car traffic?

95

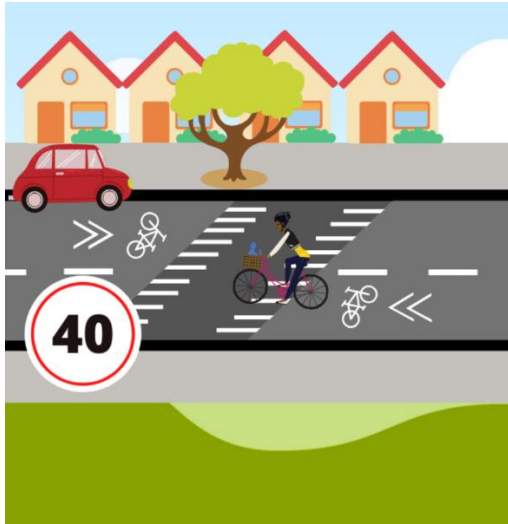

96

- Sliding scale – 1 (Very Uncomfortable) to 4 (Very Comfortable)

98

99

100 Q14. How comfortable would you feel riding a bike on a two-lane commercial shopping street with  
101 traffic speeds of 30-40 km/h, on-street parking and no bike lane?

102

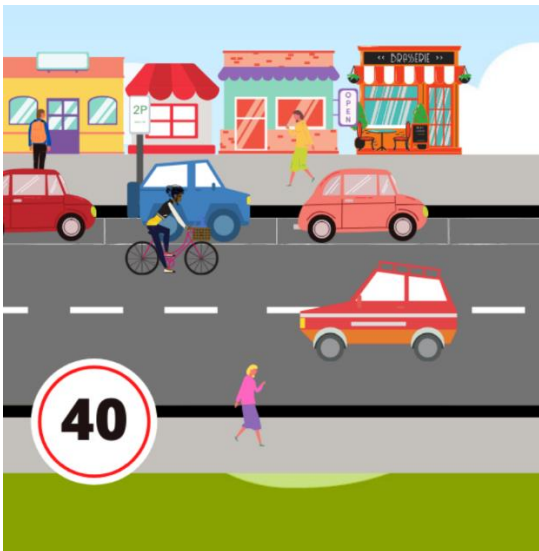

103

- Sliding scale – 1 (Very Uncomfortable) to 4 (Very Comfortable)

105

106 Q15. How comfortable would you feel riding a bike on a two-lane commercial shopping street with  
107 traffic speeds of 30-40 km/h, on-street parking and a painted bike-lane?  
108

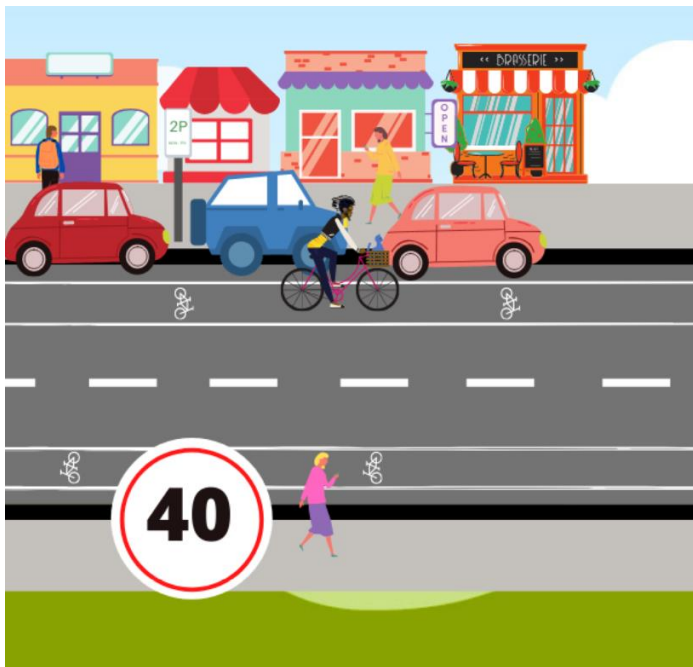

109  
110 • Sliding scale – 1 (Very Uncomfortable) to 4 (Very Comfortable)

111  
112

113 Q16. How comfortable would you feel riding a bike on a major urban or suburban street with four  
114 lanes, on-street parking, traffic speeds of 50-60 km/h, and no bike lane?  
115

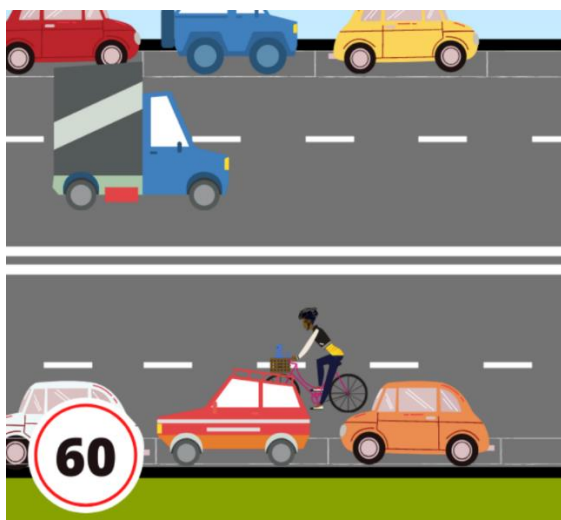

116  
117 • Sliding scale – 1 (Very Uncomfortable) to 4 (Very Comfortable)

118

119 Q17. How comfortable would you feel riding a bike on a major urban or suburban street with four  
120 lanes, on-street parking, traffic speeds of 50-60 km/h, and a painted bike-lane?

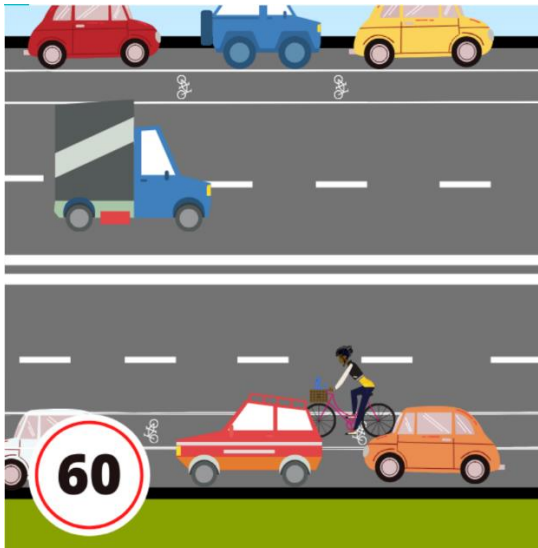

121

122 • Sliding scale – 1 (Very Uncomfortable) to 4 (Very Comfortable)

123

124 Q18. How comfortable would you feel riding a bike on a major urban or suburban street with four  
125 lanes, on-street parking, traffic speeds of 50-60 km/h, and a wide bike lane separated from traffic by  
126 a raised curb or parked cars?

127

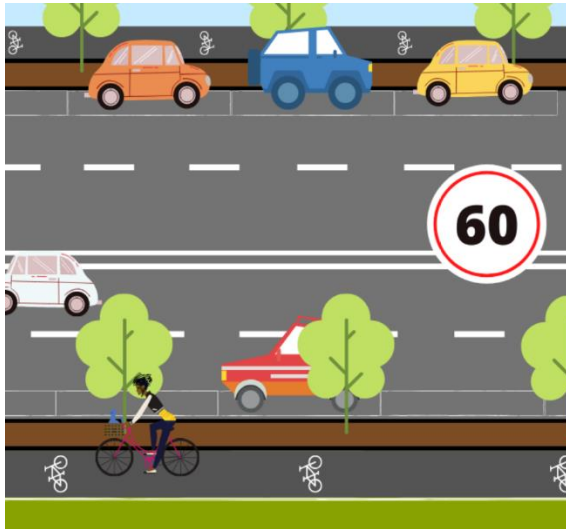

128

- Sliding scale – 1 (Very Uncomfortable) to 4 (Very Comfortable)

130

131 Q19. How comfortable would you feel riding a bike on a major street with two lanes in each  
132 direction, a centre divider, on-street parking, traffic speeds 50-60 km/h, and no bike lane?

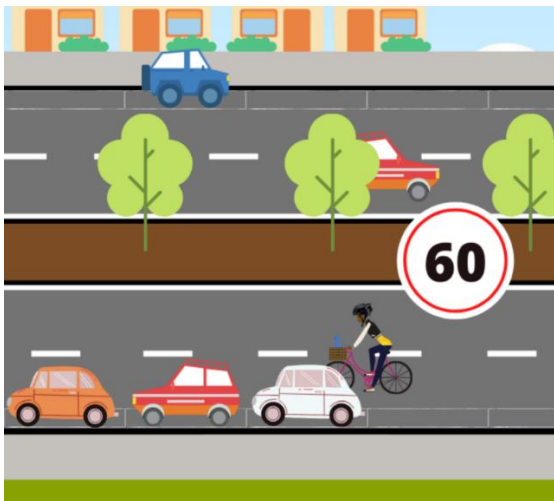

133

- Sliding scale – 1 (Very Uncomfortable) to 4 (Very Comfortable)

135



136 Q20. How comfortable would you feel riding a bike on a major street with two lanes in each  
137 direction, a centre divider, on-street parking, traffic speeds 50-60 km/h, and a wide bike lane  
138 separated from traffic by a raised curb or parked cars?

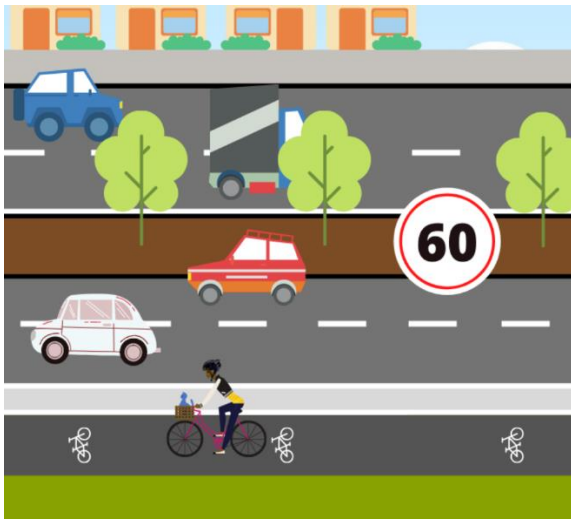

139

- Sliding scale – 1 (Very Uncomfortable) to 4 (Very Comfortable)

141

142 Q21. Please indicate how you feel about the following statement: "I would like to ride a bike more"

- Sliding scale – 1 (Strongly Disagree) to 4 (Strongly Agree)

144

145 **Supplementary Material B – Demographic characteristics**

146 *Table 1. Calculated sample sizes for each LGA based on description in methods, the total number of ORU panel members*  
 147 *residing in each LGA (member panel total) and the number of people who then completed a survey and were included in the*  
 148 *study (total sample size)*

| <b>Local Government Area</b>         | <b>Recommended Sample Size (n)</b> | <b>Member Panel Total (n)</b> | <b>Total Sample Size (n)</b> |
|--------------------------------------|------------------------------------|-------------------------------|------------------------------|
| <b><i>Greater Melbourne LGAs</i></b> |                                    |                               |                              |
| Banyule City Council                 | 79                                 | 165                           | 85                           |
| Bayside City Council                 | 64                                 | 106                           | 88                           |
| Brimbank City Council                | 127                                | 294                           | 136                          |
| Cardinia Shire Council               | 65                                 | 103                           | 75                           |
| City of Boroondara                   | 110                                | 194                           | 123                          |
| City of Casey                        | 207                                | 276                           | 229                          |
| City of Darebin                      | 98                                 | 185                           | 102                          |
| City of Glen Eira                    | 94                                 | 195                           | 98                           |
| City of Greater Dandenong            | 101                                | 145                           | 122                          |
| City of Kingston                     | 99                                 | 147                           | 121                          |
| City of Knox                         | 99                                 | 133                           | 129                          |
| City of Melbourne                    | 103                                | 450                           | 152                          |
| City of Melton                       | 95                                 | 205                           | 131                          |
| City of Monash                       | 122                                | 205                           | 143                          |
| City of Moonee Valley                | 78                                 | 144                           | 112                          |
| City of Port Phillip                 | 69                                 | 251                           | 73                           |
| City of Stonnington                  | 71                                 | 166                           | 86                           |
| City of Whitehorse                   | 107                                | 173                           | 158                          |
| City of Whittlesea                   | 136                                | 221                           | 145                          |
| City of Yarra                        | 60                                 | 112                           | 74                           |
| Frankston City Council               | 86                                 | 151                           | 103                          |
| Hobsons Bay City Council             | 59                                 | 95                            | 67                           |
| Hume City Council                    | 136                                | 168                           | 168                          |
| Manningham Council                   | 76                                 | 128                           | 126                          |
| Maribyrnong City Council             | 56                                 | 120                           | 72                           |
| Maroondah City Council               | 71                                 | 119                           | 99                           |

|                                 |     |     |     |
|---------------------------------|-----|-----|-----|
| Moreland City Council           | 110 | 236 | 147 |
| Mornington Peninsula Shire      | 101 | 98  | 110 |
| Nillumbik Shire Council         | 39  | 101 | 41  |
| Wyndham City                    | 155 | 203 | 197 |
| Yarra Ranges Shire              | 96  | 138 | 102 |
| <b><i>Regional LGAs</i></b>     |     |     |     |
| City of Ballarat                | 63  | 104 | 75  |
| City of Greater Bendigo         | 68  | 83  | 80  |
| City of Greater Geelong         | 149 | 185 | 166 |
| City of Latrobe                 | 44  | 53  | 60  |
| Greater Shepparton City Council | 39  | 44  | 48  |
| Surf Coast Shire                | 19  | 35  | 21  |

---

149  
150

151 **Supplementary Material C – Demographic characteristics**

152 *Table 3. Demographic characteristics of the weighted sample and target population*

|                                          | <b>Unweighted<br/>Study Sample<br/>(n = 3999)</b> | <b>Weighted<br/>Study Sample<br/>(n = 3999)</b> | <b>Aggregated LGA<br/>Population*</b> |
|------------------------------------------|---------------------------------------------------|-------------------------------------------------|---------------------------------------|
| <b>Gender</b>                            |                                                   |                                                 |                                       |
| Female                                   | 48.8%                                             | 49.1%                                           | 51.0%                                 |
| Male                                     | 50.7%                                             | 50.5%                                           | 49.0%                                 |
| Non-binary                               | 0.3%                                              | 0.3%                                            | N/A                                   |
| Other                                    | 0.0%                                              | 0.0%                                            | N/A                                   |
| Prefer not to say                        | 0.2%                                              | 0.1%                                            | N/A                                   |
| <b>Age Category</b>                      |                                                   |                                                 |                                       |
| 18-24 years                              | 11.2%                                             | 11.1%                                           | 12.7%                                 |
| 25-34 years                              | 18.9%                                             | 18.7%                                           | 20.3%                                 |
| 35-44 years                              | 16.0%                                             | 15.7%                                           | 17.9%                                 |
| 45-54 years                              | 15.5%                                             | 15.5%                                           | 16.7%                                 |
| 55-64 years                              | 17.7%                                             | 17.9%                                           | 13.9%                                 |
| 65-74 years                              | 16.7%                                             | 16.9%                                           | 10.1%                                 |
| 75+ years                                | 4.1%                                              | 4.2%                                            | 8.4%                                  |
| <b>Income</b>                            |                                                   |                                                 |                                       |
| \$1 - \$10,399                           | 8.3%                                              | 8.3%                                            | 9.4%                                  |
| \$10,400 - \$20,799                      | 8.7%                                              | 8.6%                                            | 23.2%                                 |
| \$20,800 - \$31,199                      | 11.5%                                             | 11.6%                                           | 13.3%                                 |
| \$31,200 - \$41,599                      | 8.9%                                              | 9.0%                                            | 12.4%                                 |
| \$41,600 - \$51,999                      | 10.6%                                             | 10.6%                                           | 10.3%                                 |
| \$52,000 - \$64,999                      | 11.3%                                             | 11.3%                                           | 9.8%                                  |
| \$65,000 - \$77,999                      | 10.4%                                             | 10.3%                                           | 6.8%                                  |
| \$78,000 - \$103,999                     | 15.5%                                             | 15.5%                                           | 7.5%                                  |
| \$104,000 +                              | 14.8%                                             | 14.6%                                           | 7.4%                                  |
| <b>English not main language at home</b> | 12.0%                                             | 11.8%                                           | 22.6%**                               |
| <b>English main language at home</b>     |                                                   | 88.2%                                           | 77.4%                                 |

153 \*based on ABS Census 2016 data (25)

154 \*\*in all of Victoria (28)

155

156

157 **Supplementary Material D – Proportions and chi-square results for region of residence, gender,**  
158 **age and income**159 *Table 4. Bike-riding behaviours and Geller Groups based on region of residence*

|                                      | <b>Greater<br/>Melbourne<br/>LGAs</b> | <b>Regional<br/>LGAs</b> | <i>p</i> -value | $\chi^2$ | <i>f</i> |
|--------------------------------------|---------------------------------------|--------------------------|-----------------|----------|----------|
| <b>Proportion of weighted sample</b> | 88.1%                                 | 11.9%                    |                 |          |          |
| <b>Geller groups</b>                 |                                       |                          | <0.001          | 19.4     | 3        |
| Strong and Fearless                  | 2.7%                                  | 3.4%                     |                 |          |          |
| Enthused and Confident               | 3.0%                                  | 4.6%                     |                 |          |          |
| Interested but Concerned             | 79.3%                                 | 70.5%                    |                 |          |          |
| No Way No How                        | 14.9%                                 | 21.4%                    |                 |          |          |
| <b>Bike ownership</b>                |                                       |                          | 0.25            | 1.4      | 1        |
| Yes                                  | 57.0%                                 | 59.8%                    |                 |          |          |
| No                                   | 43.0%                                 | 40.2%                    |                 |          |          |
| <b>Frequency of riding a bike</b>    |                                       |                          | 0.51            | 3.5      | 4        |
| Never                                | 32.5%                                 | 35.6%                    |                 |          |          |
| 1 - 3 times per year                 | 26.9%                                 | 27.9%                    |                 |          |          |
| 1 - 3 times per month                | 20.3%                                 | 19.2%                    |                 |          |          |
| 1 - 3 times per week                 | 14.7%                                 | 12.4%                    |                 |          |          |
| 4 + days per week                    | 5.6%                                  | 4.8%                     |                 |          |          |
| <b>Primary trip purpose *</b>        |                                       |                          | 0.15            | 5.7      | 3        |
| Transport only                       | 7.4%                                  | 6.3%                     |                 |          |          |
| Recreation only                      | 71.1%                                 | 76.5%                    |                 |          |          |
| Both transport and recreation        | 21.6%                                 | 17.1%                    |                 |          |          |

160 \* based on those who had ridden a bike in the 12 months previous to COVID-19 restrictions

161

162 *Table 5. Bike-riding behaviours and Geller Groups based on gender*

|                                      | <b>Women</b> | <b>Men</b> | <b>p-value</b> | <b>X<sup>2</sup></b> | <b>f</b> |
|--------------------------------------|--------------|------------|----------------|----------------------|----------|
| <b>Proportion of weighted sample</b> | 49.3%        | 50.7%      |                |                      |          |
| <b>Geller groups</b>                 |              |            | <0.001         | 79.7                 |          |
| Strong and Fearless                  | 1.6%         | 4.0%       |                |                      | 3        |
| Enthused and Confident               | 1.6%         | 4.7%       |                |                      |          |
| Interested but Concerned             | 77.5%        | 79.0%      |                |                      |          |
| No Way No How                        | 19.2%        | 12.3%      |                |                      |          |
| <b>Bike ownership</b>                |              |            | <0.001         | 49.6                 | 1        |
| Yes                                  | 51.7%        | 62.7%      |                |                      |          |
| No                                   | 48.3%        | 37.3%      |                |                      |          |
| <b>Frequency of riding a bike</b>    |              |            | <0.001         | 199.8                | 4        |
| Never                                | 40.3%        | 25.7%      |                |                      |          |
| 1 - 3 times per year                 | 29.1%        | 25.1%      |                |                      |          |
| 1 - 3 times per month                | 18.6%        | 21.7%      |                |                      |          |
| 1 - 3 times per week                 | 9.4%         | 19.4%      |                |                      |          |
| 4 + days per week                    | 2.7%         | 8.2%       |                |                      |          |
| <b>Primary trip purpose *</b>        |              |            | <0.001         | 134.9                | 3        |
| Transport only                       | 5.9%         | 8.3%       |                |                      |          |
| Recreation only                      | 77.9%        | 66.9%      |                |                      |          |
| Both transport and recreation        | 16.2%        | 24.8%      |                |                      |          |

163 \* based on those who had ridden a bike in the 12 months previous to COVID-19 restrictions

164

165 *Table 6. Bike-riding behaviours and Geller Groups based on age group*

|                                      | <b>18 – 34<br/>years</b> | <b>35 – 54<br/>years</b> | <b>55 – 74<br/>years</b> | <b>75+<br/>years</b> | <b>p-value</b> | <b>X<sup>2</sup></b> | <b>f</b> |
|--------------------------------------|--------------------------|--------------------------|--------------------------|----------------------|----------------|----------------------|----------|
| <b>Proportion of weighted sample</b> | 29.6%                    | 31.2%                    | 34.9%                    | 4.2%                 |                |                      |          |
| <b>Geller groups</b>                 |                          |                          |                          |                      | <0.001         | 214.7                | 9        |
| Strong and Fearless                  | 2.9%                     | 3.4%                     | 2.5%                     | 0.6%                 |                |                      |          |
| Enthused and Confident               | 4.1%                     | 3.5%                     | 2.3%                     | 2.4%                 |                |                      |          |
| Interested but Concerned             | 83.8%                    | 82.8%                    | 72.4%                    | 54.6%                |                |                      |          |
| No Way No How                        | 9.2%                     | 10.3%                    | 22.9%                    | 42.3%                |                |                      |          |
| <b>Bike ownership</b>                |                          |                          |                          |                      | <0.001         | 167.4                | 3        |
| Yes                                  | 64.0%                    | 64.0%                    | 50.0%                    | 20.4%                |                |                      |          |
| No                                   | 36.0%                    | 36.0%                    | 50.0%                    | 79.6%                |                |                      |          |
| <b>Frequency of riding a bike</b>    |                          |                          |                          |                      | <0.001         | 202.6                | 12       |
| Never                                | 22.6%                    | 30.4%                    | 39.9%                    | 64.9%                |                |                      |          |
| 1 - 3 times per year                 | 27.2%                    | 26.9%                    | 28.0%                    | 20.1%                |                |                      |          |
| 1 - 3 times per month                | 24.4%                    | 21.3%                    | 17.3%                    | 5.6%                 |                |                      |          |
| 1 - 3 times per week                 | 18.6%                    | 15.0%                    | 11.2%                    | 7.5%                 |                |                      |          |
| 4 + days per week                    | 7.2%                     | 6.4%                     | 3.7%                     | 1.8%                 |                |                      |          |
| <b>Primary trip purpose *</b>        |                          |                          |                          |                      | <0.001         | 375.0                | 9        |
| Transport only                       | 13.6%                    | 5.6%                     | 2.1%                     | 5.1%                 |                |                      |          |
| Recreation only                      | 56.8%                    | 73.4%                    | 85.4%                    | 84.3%                |                |                      |          |
| Both transport and recreation        | 29.5%                    | 21.0%                    | 12.5%                    | 10.6%                |                |                      |          |

\* based on those who had ridden a bike in the 12 months previous to COVID-19 restrictions

166  
167

168  
169

Table 7. Bike-riding behaviours and Geller Groups based on income group

|                                      | \$1 - \$20,799 | \$20,800 - \$41,599 | \$41,600 - \$64,999 | \$65,000 - \$103,999 | \$104,000 + | p-value | X <sup>2</sup> | f  |
|--------------------------------------|----------------|---------------------|---------------------|----------------------|-------------|---------|----------------|----|
| <b>Proportion of weighted sample</b> | 16.8%          | 20.6%               | 22.0%               | 25.9%                | 14.7%       |         |                |    |
| <b>Geller groups</b>                 |                |                     |                     |                      |             | <0.001  | 79.1           | 15 |
| Strong and Fearless                  | 1.7%           | 2.7%                | 2.1%                | 3.2%                 | 4.2%        |         |                |    |
| Enthused and Confident               | 3.0%           | 2.3%                | 4.5%                | 2.7%                 | 4.4%        |         |                |    |
| Interested but Concerned             | 75.1%          | 72.4%               | 82.0%               | 81.6%                | 81.1%       |         |                |    |
| No Way No How                        | 20.3%          | 22.6%               | 11.4%               | 12.5%                | 10.3%       |         |                |    |
| <b>Bike ownership</b>                |                |                     |                     |                      |             | <0.001  | 99.7           | 5  |
| Yes                                  | 51.5%          | 47.0%               | 61.1%               | 65.3%                | 67.4%       |         |                |    |
| No                                   | 48.5%          | 53.0%               | 38.9%               | 34.7%                | 32.6%       |         |                |    |
| <b>Frequency of riding a bike</b>    |                |                     |                     |                      |             | <0.001  | 133.9          | 20 |
| Never                                | 18.9%          | 15.3%               | 22.1%               | 24.0%                | 24.6%       |         |                |    |
| 1 - 3 times per year                 | 12.6%          | 13.1%               | 17.1%               | 18.1%                | 14.2%       |         |                |    |
| 1 - 3 times per month                | 26.7%          | 25.1%               | 27.6%               | 25.9%                | 28.0%       |         |                |    |
| 1 - 3 times per week                 | 4.4%           | 5.3%                | 5.5%                | 7.3%                 | 6.2%        |         |                |    |
| 4 + days per week                    | 37.5%          | 41.2%               | 27.7%               | 24.6%                | 27.0%       |         |                |    |
| <b>Primary trip purpose *</b>        |                |                     |                     |                      |             |         |                |    |
| Transport only                       | 13.5%          | 11.1%               | 7.7%                | 3.7%                 | 3.9%        | <0.001  | 167.8          | 15 |
| Recreation only                      | 60.9%          | 68.5%               | 70.4%               | 72.6%                | 77.5%       |         |                |    |
| Both transport and recreation        | 25.6%          | 20.4%               | 21.9%               | 23.7%                | 18.6%       |         |                |    |

170 \* based on those who had ridden a bike in the 12 months previous to COVID-19 restrictions

171

172



**Supplementary Material D – Four Types of Cyclist proportions by LGA**

|                            | <b>Strong and Fearless (%)</b> | <b>Enthusied and Confident (%)</b> | <b>Interested but Concerned (%)</b> | <b>No Way No How (%)</b> |
|----------------------------|--------------------------------|------------------------------------|-------------------------------------|--------------------------|
| Banyule City Council       | 7.1                            | 3.5                                | 78.8                                | 10.6                     |
| Bayside City Council       | 6.0                            | 3.6                                | 74.7                                | 15.7                     |
| Brimbank City Council      | 2.2                            | 0.7                                | 83.6                                | 13.4                     |
| Cardinia Shire Council     | 0.0                            | 0.0                                | 85.3                                | 14.7                     |
| City of Boroondara         | 2.5                            | 3.3                                | 77.5                                | 16.7                     |
| City of Casey              | 3.1                            | 0.9                                | 82.1                                | 13.9                     |
| City of Darebin            | 2.0                            | 3.0                                | 75.0                                | 20.0                     |
| City of Glen Eira          | 6.2                            | 5.2                                | 66.0                                | 22.7                     |
| City of Greater Dandenong  | 0.8                            | 5.7                                | 81.1                                | 12.3                     |
| City of Kingston           | 2.5                            | 3.4                                | 77.3                                | 16.8                     |
| City of Knox               | 4.0                            | 2.4                                | 78.4                                | 15.2                     |
| City of Melbourne          | 3.9                            | 3.3                                | 84.2                                | 8.6                      |
| City of Melton             | 3.1                            | 2.3                                | 78.3                                | 16.3                     |
| City of Monash             | 0.0                            | 1.4                                | 83.5                                | 15.1                     |
| City of Moonee Valley      | 6.4                            | 3.6                                | 77.3                                | 12.7                     |
| City of Port Phillip       | 2.8                            | 4.2                                | 70.8                                | 22.2                     |
| City of Stonnington        | 0.0                            | 1.2                                | 78.8                                | 20.0                     |
| City of Whitehorse         | 0.6                            | 4.5                                | 77.6                                | 17.3                     |
| City of Whittlesea         | 4.9                            | 3.5                                | 79.9                                | 11.8                     |
| City of Yarra              | 2.8                            | 4.2                                | 75.0                                | 18.1                     |
| Frankston City Council     | 2.0                            | 3.0                                | 73.3                                | 21.8                     |
| Hobsons Bay City Council   | 1.5                            | 4.5                                | 74.6                                | 19.4                     |
| Hume City Council          | 3.6                            | 5.4                                | 77.7                                | 13.3                     |
| Manningham Council         | 1.6                            | 3.2                                | 88.0                                | 7.2                      |
| Maribyrnong City Council   | 2.8                            | 2.8                                | 86.1                                | 8.3                      |
| Maroondah City Council     | 2.0                            | 1.0                                | 79.6                                | 17.3                     |
| Moreland City Council      | 2.1                            | 4.2                                | 83.3                                | 10.4                     |
| Mornington Peninsula Shire | 2.8                            | 2.8                                | 75.9                                | 18.5                     |
| Nillumbik Shire Council    | 0.0                            | 7.3                                | 80.5                                | 12.2                     |
| Wyndham City               | 2.6                            | 1.6                                | 83.9                                | 12.0                     |
| Yarra Ranges Council       | 2.0                            | 2.9                                | 80.4                                | 14.7                     |
| City of Ballarat           | 4.1                            | 6.8                                | 65.8                                | 23.3                     |
| City of Greater Bendigo    | 3.8                            | 2.5                                | 68.4                                | 25.3                     |
| City of Greater Geelong    | 2.5                            | 5.0                                | 67.9                                | 24.5                     |
| City of Latrobe            | 5.3                            | 5.3                                | 75.4                                | 14.0                     |
| Greater Shepparton Council | 4.3                            | 4.3                                | 74.5                                | 17.0                     |
| Surf Coast Shire           | 0.0                            | 0.0                                | 95.7                                | 4.3                      |
